# Supplementary material for: Tracking of General and Abdominal Obesity in Children Between 4 and 9 Years of Age: The Longitudinal Childhood Obesity Study (ELOIN)
Source: Research Square preprint supplement (doi:10.21203/rs.3.rs-658635/v1), 2021-09-02
Supplement: Supplementary file 1 [file c9b2285001f9aa5938c1e23e.docx]

(A)

(B)

Figure 1S. Variations in weight status (normal weight, overweight, and obesity) from 4 to 9 years (A) and from 6 to 9 years of age (B). WHO-2007 Criteria.

(A)

(B)

Figure 2S. Variations in abdominal obesity according to waist circumference: (A) from 4 to 9 years and (B) from 6 to 9 years of age. IDF criteria.
